# Supplementary material
Source: publisher figshare collection journal article supplement (https://tandf.figshare.com/ndownloader/files/16840691)
Supplement: Supplementary file 1 [file 16840691]

**Supplementary Table: Results of ordinal regression analysis to identify significant predictors of psychological distress using an alternative categorisation for psychological distress**

|  | **#Well/No Distress** | **#Mild-Mod Distress** | **#High**  **Distress** | **Unadjusted**  **p-value** | **^Adjusted Model** |
| --- | --- | --- | --- | --- | --- |
| **Atopic Sensitised**  No  Yes | 89 (71.8%)  183 (70.4%) | 29 (23.4%)  69 (26.5%) | 6 (4.8%)  8 (3.1%) | P=0.587 | P=0.864 |
| **Food Allergy Ever**  No  Yes | 207 (73.4%)  81 (71.1%) | 66 (23.4%)  28 (24.6%) | 9 (3.2%)  5 (4.4%) | P=0.803 | P=0.569 |
| **Hay fever <12months**  No  Yes | 156 (75%)  144 (68.9%) | 44 (21.2%)  58 (27.8%) | 8 (3.8%)  7 (3.3%) | P=0.291 | P=0.275 |
| **Eczema <12months**  No  Yes | 214 (73.5%)  79 (66.9%) | 67 (23.0%)  33 (28.0%) | 10 (3.4%)  6 (5.1%) | P=0.388 | P=0.376 |
| **Current Asthma**  No  Yes | **228 (74.8%)**  61 (62.2%) | 65 (21.3%)  **33 (33.7%)** | 12 (3.9%)  4 (4.1%) | **P=0.040** | **P=0.018** |
| **Asthma Severity**  Mild  Mod/Severe | 38 (64.4%)  23 (59.0%) | 19 (32.2%)  14 (35.9%) | 2 (3.4%)  2 (5.1%) | P=0.882 | P=0.887 |
| **Number of current atopic conditions**  0  1  2  3 | 106 (78.5%)  101 (71.6%)  61 (67.8%)  16 (57.1%) | 24 (17.8%)  36 (25.5%)  24 (26.7%)  11 (39.3%) | 5 (3.7%)  4 (2.8%)  5 (5.6%)  1 (3.6%) | P=0.184 | **P=0.031** |

# Well/No Distress - K6 total score 6-11; Mild-Mod Distress – K6 total score 12-19; High Distress – K6 total score 20-30

^ p-value adjusted for gender, smoking status, and SES in an ordinal logistic regression
